# Supplementary material
Source: HighWire-hosted journal article supplement (https://bjsm.bmj.com/content/58/2/97)
Supplement: inline-supplementary-material-2 [file inline-supplementary-material-2.pdf]

Supplementary Table 2: Database search details and results.

| <b>Database: Medline via Pubmed</b>                             |                            |                                                                                                                                                                                                                                                  |                     |
|-----------------------------------------------------------------|----------------------------|--------------------------------------------------------------------------------------------------------------------------------------------------------------------------------------------------------------------------------------------------|---------------------|
| <b>Date of initial Search: 23.2.22</b>                          |                            |                                                                                                                                                                                                                                                  |                     |
| <b>Search #</b>                                                 | <b>Concept/Explanation</b> | <b>Search Terms</b>                                                                                                                                                                                                                              | <b># of Results</b> |
| # 1                                                             | Cancer                     | cancer OR oncolog* OR neoplasm OR tumor OR tumour OR malignan*                                                                                                                                                                                   | 5461712             |
| # 2                                                             | Treatment                  | chemother* OR "radiation therapy" OR radiotherapy OR chemoradiation OR "Stem Cell Transplant*" OR "Bone Marrow Transplant*" OR hsct                                                                                                              | 1110890             |
| # 3                                                             | Exercise                   | "physical activit*" OR exercis* OR exercising OR "resistance training" OR "resistance exercise" OR "aerobic training" OR "aerobic exercise" OR cycling OR "endurance training" OR "endurance exercise" OR yoga OR "tai chi" OR "weight training" | 1395770             |
| # 4                                                             | Hospitalization            | hospitali* OR admitted OR inpatient OR "length of stay" OR "patient readmission"                                                                                                                                                                 | 862441              |
| # 5                                                             | 1 and 2 and 3 and 4        |                                                                                                                                                                                                                                                  | 2709                |
| <b>Database: EMBASE</b>                                         |                            |                                                                                                                                                                                                                                                  |                     |
| <b>Date of initial Search: 23.2.22</b>                          |                            |                                                                                                                                                                                                                                                  |                     |
| <b>Search #</b>                                                 | <b>Concept/Explanation</b> | <b>Search Terms</b>                                                                                                                                                                                                                              | <b># of Results</b> |
| # 1                                                             | Cancer                     | cancer OR oncolog* OR neoplasm OR tumor OR tumour OR malignan*                                                                                                                                                                                   | 6062590             |
| # 2                                                             | Treatment                  | chemother* OR "radiation therapy" OR radiotherapy OR chemoradiation OR "Stem Cell Transplant*" OR "Bone Marrow Transplant*" OR hsct                                                                                                              | 1663983             |
| # 3                                                             | Exercise                   | "physical activit*" OR exercis* OR exercising OR "resistance training" OR "resistance exercise" OR "aerobic training" OR "aerobic exercise" OR cycling OR "endurance training" OR "endurance exercise" OR yoga OR "tai chi" OR "weight training" | 881572              |
| # 4                                                             | Hospitalization            | hospitali* OR admitted OR inpatient OR "length of stay" OR "patient readmission"                                                                                                                                                                 | 1341618             |
| # 5                                                             | 1 and 2 and 3 and 4        |                                                                                                                                                                                                                                                  | 543                 |
| <b>Database: Cochrane Central Register of Controlled Trials</b> |                            |                                                                                                                                                                                                                                                  |                     |
| <b>Date of initial Search: 23.2.22</b>                          |                            |                                                                                                                                                                                                                                                  |                     |
| <b>Search #</b>                                                 | <b>Concept/Explanation</b> | <b>Search Terms</b>                                                                                                                                                                                                                              | <b># of Results</b> |
| # 1                                                             | Cancer                     | cancer OR oncolog* OR neoplasm OR tumor OR tumour OR malignan*                                                                                                                                                                                   | 241812              |

|     |                     |                                                                                                                                                                                                                                                                       |        |
|-----|---------------------|-----------------------------------------------------------------------------------------------------------------------------------------------------------------------------------------------------------------------------------------------------------------------|--------|
| # 2 | Treatment           | chemother* OR "radiation therapy"<br>OR radiotherapy OR<br>chemoradiation OR "Stem Cell<br>Transplant*" OR "Bone Marrow<br>Transplant*" OR hsct                                                                                                                       | 122106 |
| # 3 | Exercise            | "physical activit*" OR exercis* OR<br>exercising OR "resistance training"<br>OR "resistance exercise" OR<br>"aerobic training" OR "aerobic<br>exercise" OR cycling OR<br>"endurance training" OR "endurance<br>exercise" OR yoga OR "tai chi"<br>OR "weight training" | 149952 |
| # 4 | Hospitalization     | hospitali* OR admitted OR<br>inpatient OR "length of stay" OR<br>"patient readmission"                                                                                                                                                                                | 108685 |
| # 5 | 1 and 2 and 3 and 4 |                                                                                                                                                                                                                                                                       | 166    |
