# Supplementary material
Source: HighWire-hosted journal article supplement (https://bjsm.bmj.com/content/58/2/97)
Supplement: inline-supplementary-material-5 [file inline-supplementary-material-5.pdf]

| Study                | Risk of bias domains |    |    |    |    | Overall |
|----------------------|----------------------|----|----|----|----|---------|
|                      | D1                   | D2 | D3 | D4 | D5 |         |
| Alibhai 2015         | +                    | X  | +  | +  | +  | X       |
| Arrieta 2019         | +                    | X  | -  | +  | +  | X       |
| Baumann 2010         | -                    | +  | +  | -  | +  | -       |
| Baumann 2011         | -                    | X  | +  | -  | +  | X       |
| DeFor 2007           | +                    | X  | +  | +  | +  | X       |
| Dimeo 1997           | -                    | X  | +  | +  | +  | X       |
| Hacker 2017          | +                    | X  | -  | -  | -  | X       |
| Jacobsen 2014        | -                    | X  | +  | +  | +  | X       |
| Jarden 2009          | +                    | -  | -  | +  | +  | -       |
| May 2017             | +                    | X  | +  | +  | +  | X       |
| Mijwel 2020          | +                    | X  | -  | +  | +  | X       |
| Mutrie 2007          | +                    | -  | +  | +  | +  | -       |
| Pahl 2020            | +                    | X  | -  | +  | +  | X       |
| Potiaumpai 2021      | +                    | X  | -  | -  | +  | X       |
| SantaMina 2020       | +                    | X  | -  | +  | +  | X       |
| Senn-Malashonak 2019 | -                    | -  | -  | -  | +  | X       |
| Uster 2018           | +                    | X  | X  | +  | +  | X       |
| Wallek 2018          | -                    | X  | X  | -  | +  | X       |
| Wehrle 2019          | +                    | X  | -  | +  | +  | X       |
| Wiskemann 2011       | -                    | +  | -  | +  | +  | -       |

Domains:  
D1: Bias arising from the randomization process.  
D2: Bias due to deviations from intended intervention.  
D3: Bias due to missing outcome data.  
D4: Bias in measurement of the outcome.  
D5: Bias in selection of the reported result.

Judgement  
 High  
 Some concerns  
 Low

**Supplementary Figure 1.** Risk of bias assessment of randomized controlled trials using the traffic light plot from the Cochrane Risk of Bias 2 tool (RoB 2).

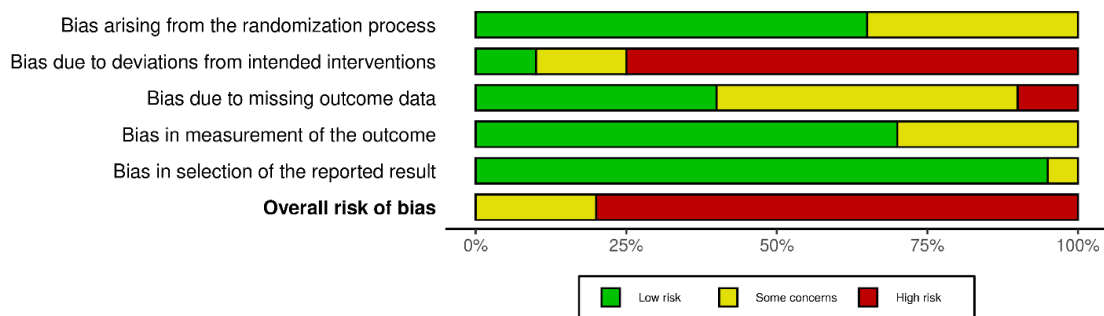

**Supplementary Figure 2.** Weighted summary plot of the overall types of bias encountered in included randomized controlled trials from the Cochrane Risk of Bias 2 tool (RoB 2).
