# Supplementary material
Source: HighWire-hosted journal article supplement (https://bjsm.bmj.com/content/58/2/97)
Supplement: inline-supplementary-material-6 [file inline-supplementary-material-6.pdf]

**Supplementary Table 4.** GRADE summary of quality of evidence

| Quality assessment                                                                                                                  |        |                      |               |              |                      |                          | Mean Difference /Difference in Proportions (95% CI)                   | Quality of evidence |
|-------------------------------------------------------------------------------------------------------------------------------------|--------|----------------------|---------------|--------------|----------------------|--------------------------|-----------------------------------------------------------------------|---------------------|
| No. of studies (No. of participants in meta-analysis)                                                                               | Design | Risk of bias         | Inconsistency | Indirectness | Imprecision          | Other considerations     |                                                                       |                     |
| Outcome: Mean difference of days spent in hospital between cancer patients participating in an exercise intervention versus control |        |                      |               |              |                      |                          |                                                                       |                     |
| 16 studies (995 participants)                                                                                                       | RCTs   | Serious <sup>1</sup> | Not serious   | Not serious  | Serious <sup>2</sup> | Not serious              | Mean Difference: 1.40 days (95% CI: -2.26 to -0.54 favouring exercise | Low                 |
| Outcome: Difference in the proportion of participants with cancer admitted to hospital in exercise intervention and control groups  |        |                      |               |              |                      |                          |                                                                       |                     |
| 5 studies (806 participants)                                                                                                        | RCTs   | Serious <sup>1</sup> | Not serious   | Not serious  | Serious <sup>2</sup> | Not serious <sup>3</sup> | Difference in proportions: -0.08 (-0.13 to -0.03) favouring exercise  | Low                 |

<sup>1</sup> Some studies had high risk of bias due to their methodology (RoB 2)

<sup>2</sup> Confidence intervals are close to the no difference line

<sup>3</sup> The possibility of publication bias cannot be excluded as it was not measured due to the small number of studies (n=5), but it was/was not considered sufficient to downgrade the quality of evidence
